# Supplementary material for: Uncovering missed indels by leveraging unmapped reads
Source: PubMed Central journal article supplement (PMC6668410; doi:10.1038/s41598-019-47405-z), 2019-07-31
Supplement: 41598_2019_47405_MOESM3_ESM.pdf [file 41598_2019_47405_MOESM3_ESM.pdf]

## **Supplementary Materials**

### Uncovering missed indels by leveraging unmapped reads

Mohammad Shabbir Hasan<sup>1</sup>, Xiaowei Wu<sup>2</sup>, and Liqing Zhang<sup>1\*</sup>

<sup>1</sup>Department of Computer Science

<sup>2</sup>Department of Statistics

Virginia Tech, Blacksburg, VA 24061.

Email: [shabbir5@vt.edu](mailto:shabbir5@vt.edu), [xwwu@vt.edu](mailto:xwwu@vt.edu), [lqzhang@vt.edu](mailto:lqzhang@vt.edu)

\* Corresponding Author

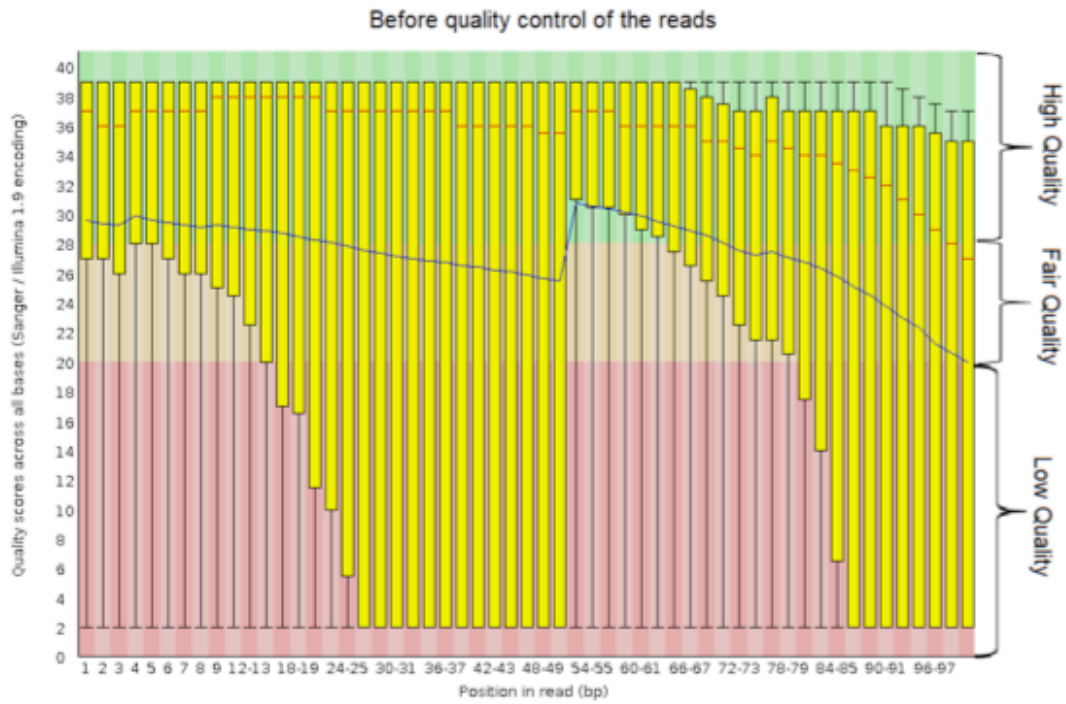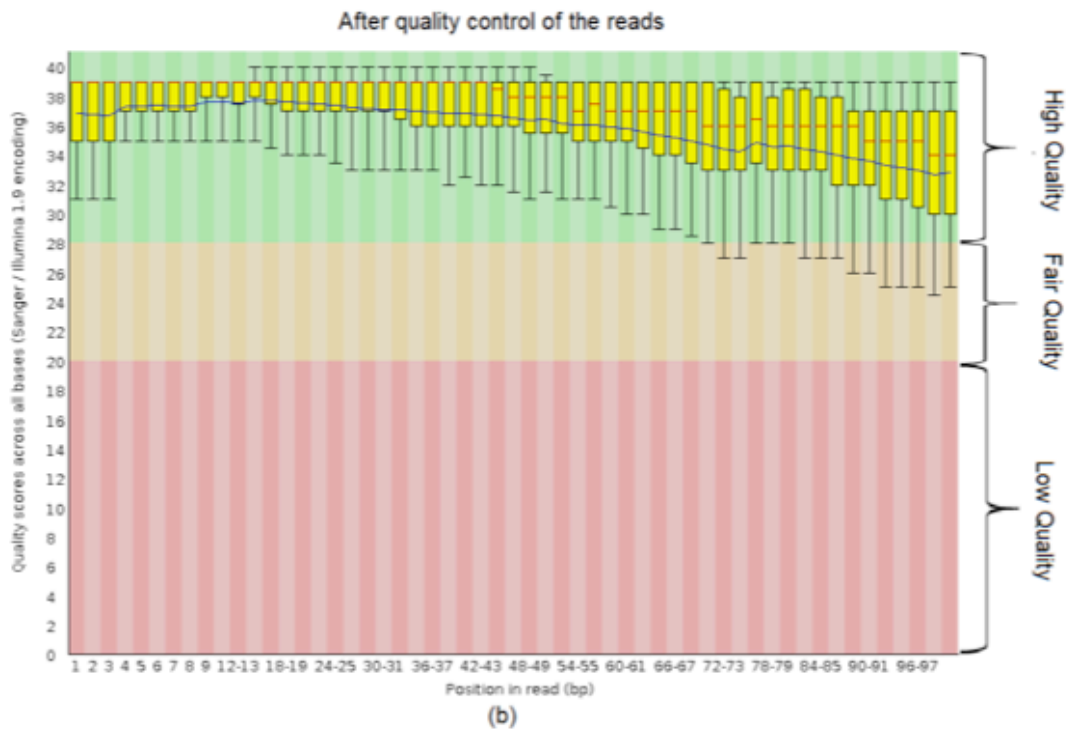

**Supplementary Figure 1:** Per base sequence quality (a) before and (b) after the quality control of the reads.

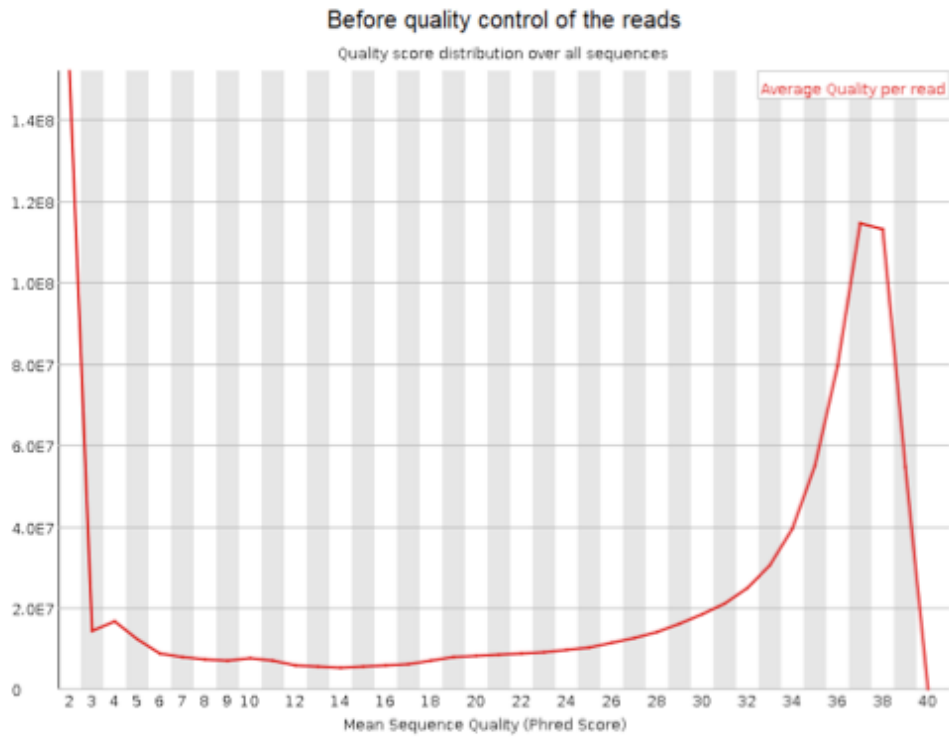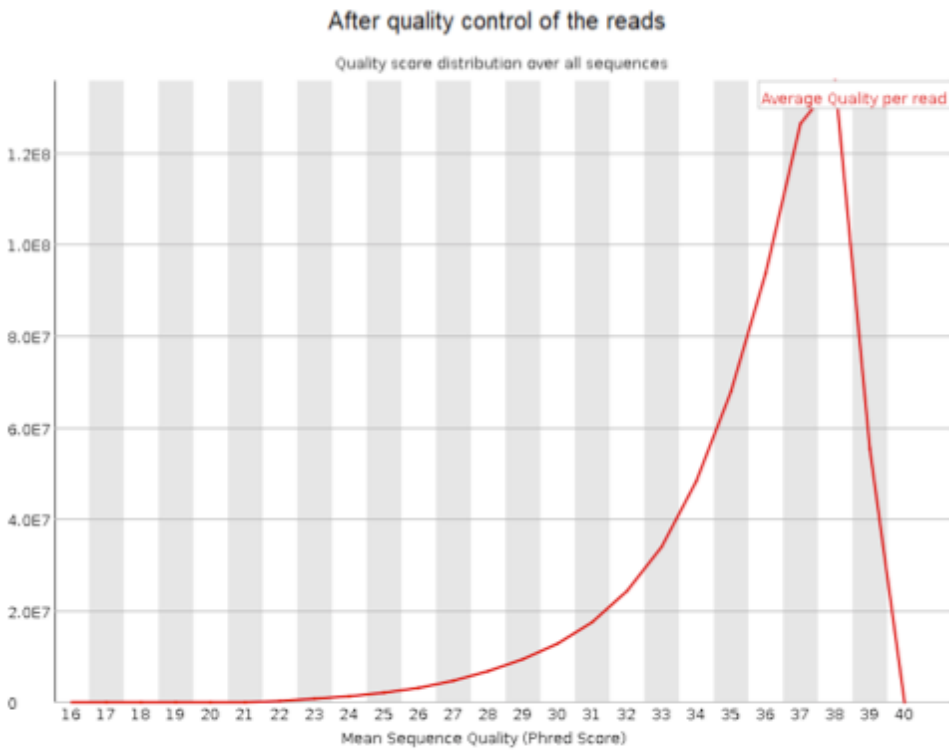

**Supplementary Figure 2:** Per sequence quality score (a) before and (b) after the quality control of the reads.

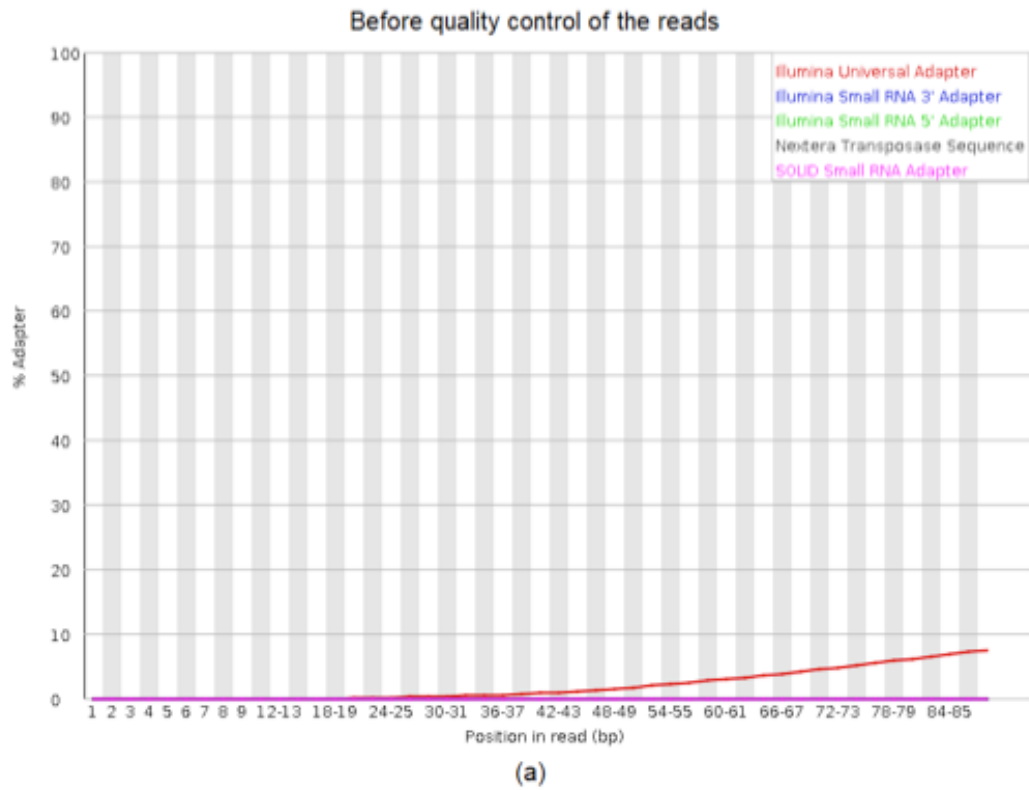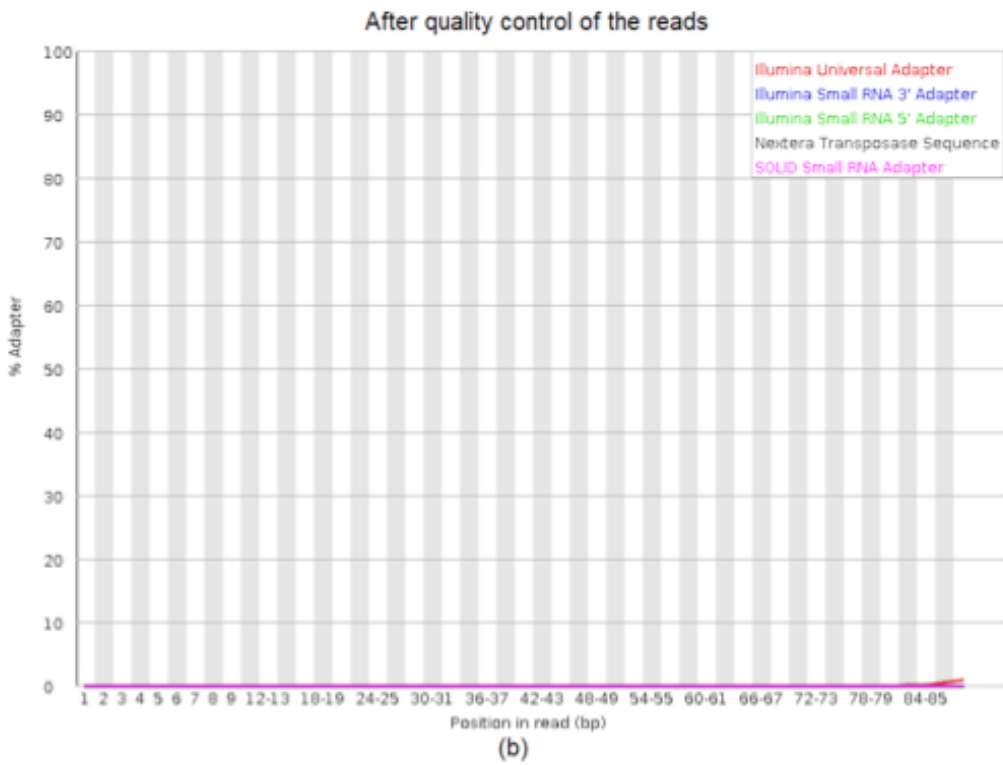

**Supplementary Figure 3:** Percentage of Adapter contents in the reads (a) before and (b) after the quality control.

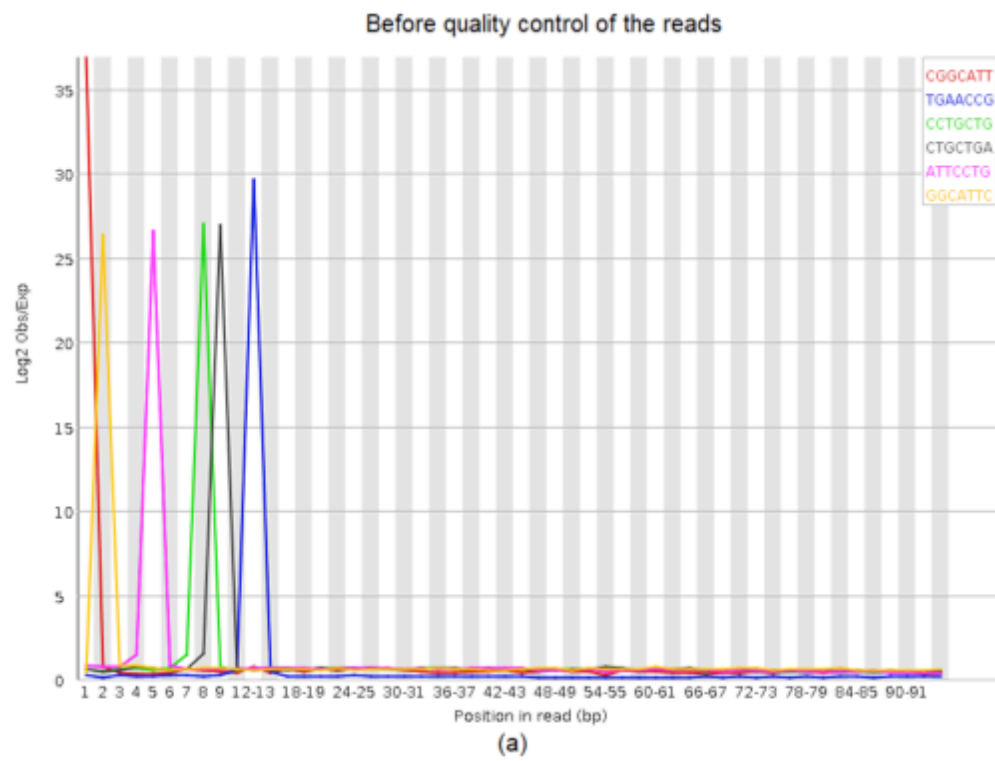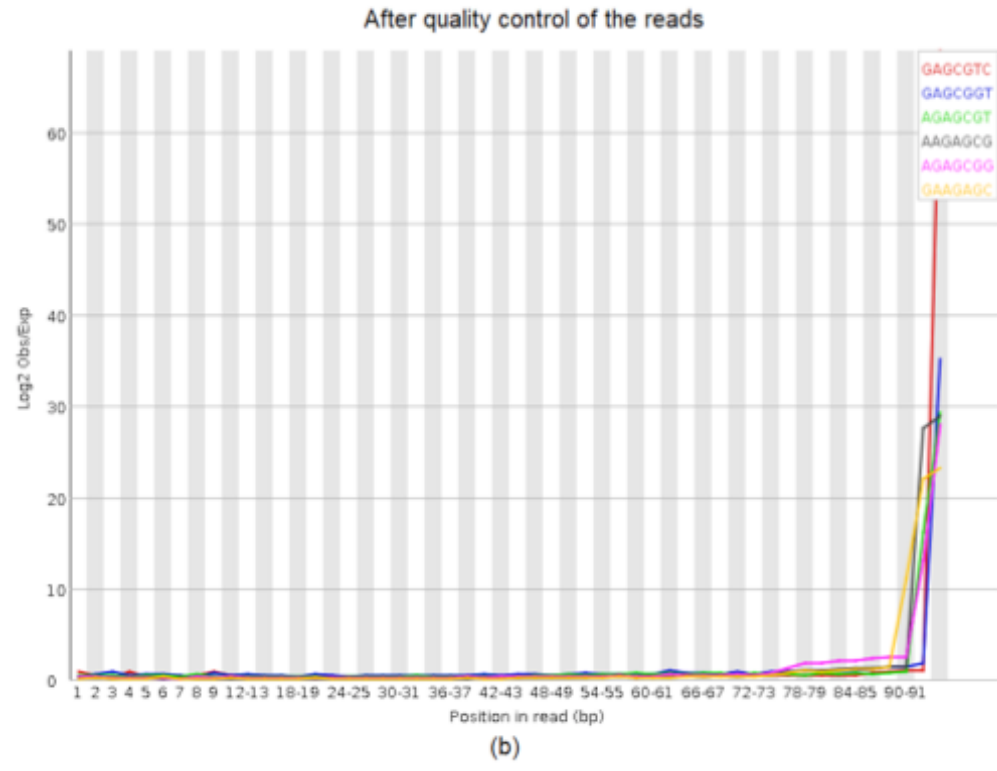

**Supplementary Figure 4:** Observance of different k-mers in the reads (a) before and (b) after the quality control.

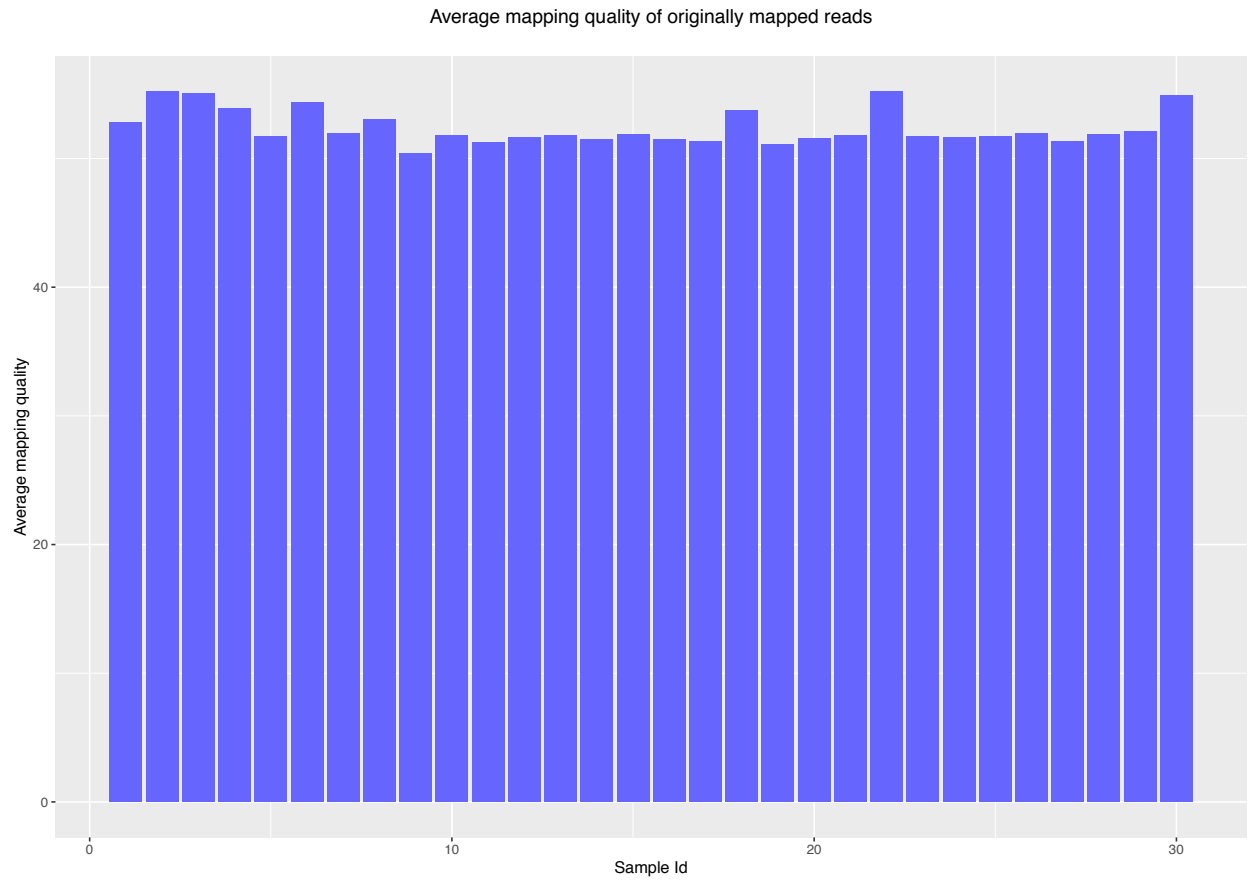

**Supplementary Figure 5:** Average mapping quality of the samples for the originally mapped reads.
